# Supplementary material for: Benefits of Probiotic Pretreatment on the Gut Microbiota and Minor Complications after Bowel Preparation for Colonoscopy: A Randomized Double-Blind, Placebo-Controlled Pilot Trial
Source: MDPI journal article supplement (doi:10.3390/nu15051141), 2023-02-24
Supplement: s1 [file s1]

A

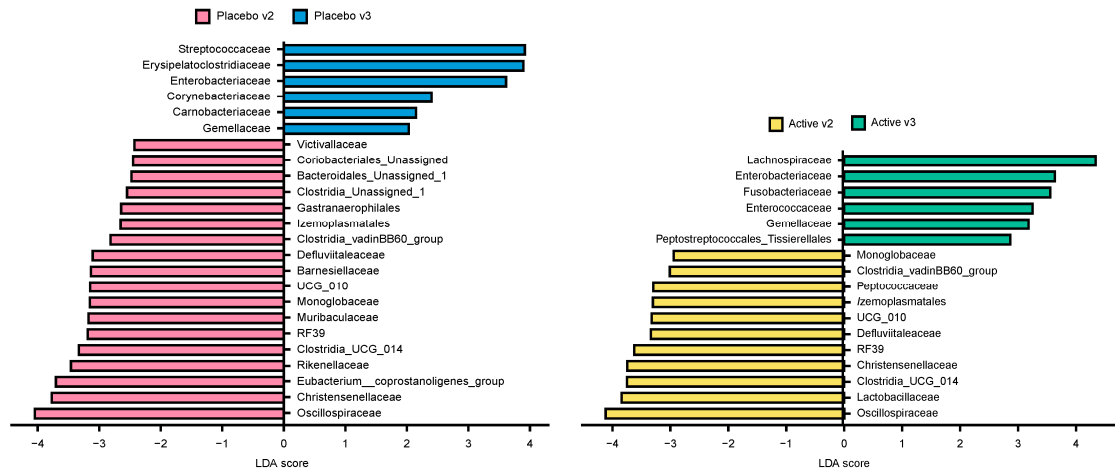

B

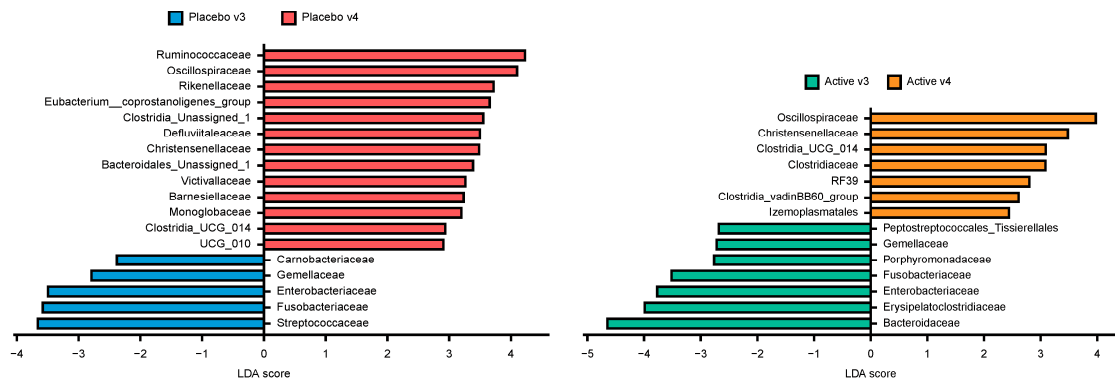

C

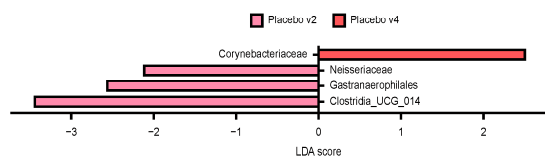

**Figure S1.** Comparative analysis via linear discriminant analysis (LDA) effect size (LEfSe) of each group at the family level (A, B, C).

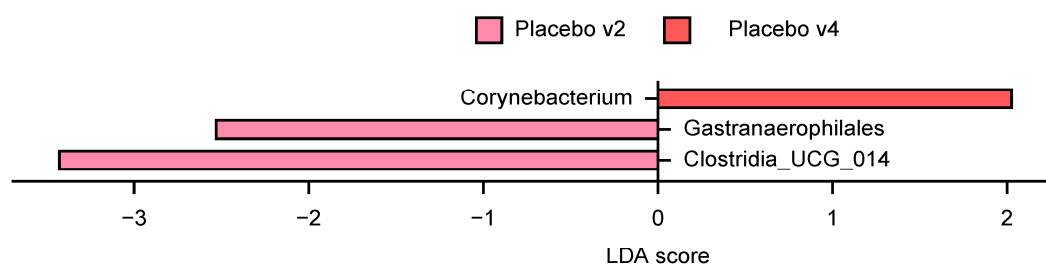

**Figure S2.** Comparative analysis of the 2nd and 4th visit groups via linear discriminant analysis (LDA) effect size (LEfSe) at the genus level.
