# Supplementary material for: Benefits of Probiotic Pretreatment on the Gut Microbiota and Minor Complications after Bowel Preparation for Colonoscopy: A Randomized Double-Blind, Placebo-Controlled Pilot Trial
Source: MDPI journal article supplement (doi:10.3390/nu15051141), 2023-02-24

## Questionnaire 2 (7<sup>th</sup> day after colonoscopy)

Subject code ( )

1. What was the form of your feces for the first time after colonoscopy? (Bristol stool scale)  
( ) type 1 ( ) type 2 ( ) type 3 ( ) type 4 ( ) type 5 ( ) type 6 ( ) type 7
2. What was the form of your feces after 7 days of colonoscopy?  
(Bristol stool scale)  
( ) type 1 ( ) type 2 ( ) type 3 ( ) type 4 ( ) type 5 ( ) type 6 ( ) type 7
3. Did you have any symptoms after colonoscopy?  
( ) No ( ) Yes
4. If you had any symptoms, what was it?  
( ) Abdominal pain ( ) Bloating ( ) Constipation ( ) Diarrhea  
( ) Nausea ( ) Vomiting ( ) Cold sweating ( ) Bleeding
5. When did it start after colonoscopy?  
( ) On the day ( ) One day after ( ) Two days after  
( ) Three days after ( ) Four days after ( ) Five days after  
( ) Six days after ( ) Seven days after
6. How often did it happen?  
( ) One a day ( ) Twice a day  
( ) More than three times a day( )
7. How long did it last?  
( ) Less than 30 minutes ( ) 1 to 2 hours ( ) 2 to 6 hours  
( ) 6 to 12 hours ( ) 12 to 24 hours ( ) More than 24 hours
8. What is the score of the symptom?  
( )

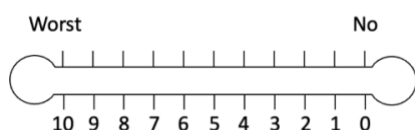

Supplement: s1 [file s1]
