# Supplementary material for: Benefits of Probiotic Pretreatment on the Gut Microbiota and Minor Complications after Bowel Preparation for Colonoscopy: A Randomized Double-Blind, Placebo-Controlled Pilot Trial
Source: MDPI journal article supplement (doi:10.3390/nu15051141), 2023-02-24
Supplement: s1 [file s1]

## Subject code ( )

1. Gender ( ) Male ( ) Female

3. Height / Weight (      /      )

5. Smoking ( ) none ( ) past ( ) current

( ) Diabetes    ( ) Hypertension    ( ) Hyperlipidemia

\* Others (describe it yourself) ( )

☐ Screening    ☐ Post-polypectomy surveillance

☐ Have any symptoms    ☐ Positive fecal occult blood test

( ) No ( ) Yes

( ) Abdominal pain ( ) Bloating ( ) Constipation ( ) Diarrhea

( ) Nausea ( ) Vomiting ( ) Anal bleeding ( )

\* Others (describe it yourself) ( )

☐ No    ☐ One to Two times    ☐ More than three times

☐ Vegetarian    ☐ Meat eater    ☐ Eat evenly

( / per day) or ( / per week)

(Bristol stool scale)

☐ type 1   ☐ type 2   ☐ type 3   ☐ type 4

( ) type 5   ( ) type 6   ( ) type 7
